# Supplementary material
Source: publisher figshare collection journal article supplement (https://tandf.figshare.com/articles/dataset/_/1130924)
Supplement: Supplementary file 1 [file 3]

## **Appendix A. List of abbreviations and select terms used in the manuscript in alphabetical order**

AIC: Akaike Information Criterion

C: Celsius

cm: centimeters

commercial size trees: Development classes 3-5 definition from Norwegian NFI (Antón-Fernández and Astrup 2012). Younger, older, and mature productive forest with satisfactory stand density. Species proportions are reported according to volume in these harvest classes.

complete crown: The function biomass combination from the current study of live crown ( $LC_{dh}$ ) and dead branches ( $DB_d$ ).

$DB_d$ : Dead branch biomass single-variable model

dbh: Diameter at breast height (1.3 m)

DW: Dry weight

FW: Fresh weight

H40: Height of tree at 40 years of age

ha: hectare

height-to-live-crown: distance from the ground to the base of the live crown, ignoring one time a single live branch if separated by more than two whorls from the next live branch.

kg: kilogram

$LB_d$ : Live branch biomass single-variable model

$LB_{dh}$ : Live branch biomass two-variable model

$LC_d$ : Live crown biomass single-variable model

$LC_{dh}$ : Live crown biomass two-variable model

$LF_d$ : Leaf biomass single-variable model

m: meter

m.a.s.l.: meters above sea level

m.t.b.: million tons biomass

N: Number

NFI: National Forest Inventory

NLME: Nonlinear mixed-effects model

NNFI: Norwegian National Forest Inventory

NNFI8: Norwegian National Forest Inventory 8th inventory (2000-2004)

NNFI9: Norwegian National Forest Inventory 9th inventory (2005-2009)

older stands: Development classes 4 and 5 definition from Norwegian NFI (Antón-Fernández and Astrup 2012). Older and mature productive forest with satisfactory stand density.

p: p-value

RMSE: Root Mean Square Error

sapling size trees: Development classes 1 and 2 definition from Norwegian NFI (Antón-Fernández and Astrup 2012). Young newly regenerating to satisfactorily dense forest. Species proportions are reported according to crown cover percentage in these harvest classes.

SB<sub>d</sub>: Stem bark biomass single-variable model

SB<sub>dh</sub>: Stem bark biomass two-variable model

std. error: Standard error

SW<sub>d</sub>: Stemwood biomass single-variable model

SW<sub>dh</sub>: Stemwood biomass two-variable model

TAG<sub>B</sub>: Total aboveground biomass component combination from Bollandsås et al. (2009) using: over-bark (“Stem”) + total crown (“Tree crown”) biomass

TAG<sub>combination 1</sub>: Total aboveground component combination using: TS<sub>dh</sub> + LC<sub>dh</sub> + DB<sub>d</sub>

TAG<sub>combination 2</sub>: Total aboveground component combination using: SW<sub>dh</sub> + SB<sub>d</sub> + LB<sub>dh</sub> + LF<sub>d</sub> + DB<sub>d</sub>

TAG<sub>d</sub>: Total aboveground biomass single-variable model (model fit with the BM<sub>ts</sub> + BM<sub>lc</sub> + BM<sub>db</sub> biomass estimates (Appendix B))

TAG<sub>dh</sub>: Total aboveground biomass two-variable model (model fit with the BM<sub>ts</sub> + BM<sub>lc</sub> + BM<sub>db</sub> biomass estimates (Appendix B))

TAG<sub>M</sub>: Total aboveground biomass for Marklund using: stemwood (B-5) + stem bark (B-8) + live branch (B-11) + dead branch (B-16) + leaves (where leaf biomass = B-5 \* (0.011<sup>a</sup>/0.52<sup>b</sup>) (<sup>a</sup> Factor currently applied by NNFI for UNFCCC reporting; <sup>b</sup> de Wit et al. 2006)

TAG<sub>S</sub>: Total aboveground biomass component combination of the current study using: SW<sub>dh</sub> + SB<sub>d</sub> + LB<sub>dh</sub> + DB<sub>d</sub> + LF<sub>d</sub>

total crown: Observed crown biomass of the mountain birch sample trees including the live and dead branches (if present) (Bollandsås et al. 2009).

TS<sub>d</sub>: Total stem biomass single-variable model

TS<sub>dh</sub>: Total stem biomass two-variable model

UNFCCC: United Nations Framework Convention on Climate Change

Unprod.: Unproductive birch forest = potential yield < 1 m<sup>3</sup> ha<sup>-1</sup> yr<sup>-1</sup>

volume-weighted total stem biomass: The average stem biomass weighted by volume of the stem section from which the sample disk was taken.

young stands: Development classes 1 and 2 definition from Norwegian NFI (Antón-Fernández and Astrup 2012). Young newly regenerating to satisfactorily dense forest.

## Appendix B. Detailed methods for the aboveground biomass dataset

### Total stem biomass estimate

$$\begin{aligned}
 (1) \text{ DW:FW}_{disk_i} &= \frac{DW_{disk_i}}{FW_{disk_i}} \\
 (2) V_{s_i} &= \frac{l_{s_i}(g_{1_i} + g_{2_i})}{2} \text{ (Smalian's formula)} \\
 (3) V_{t_j} &= \sum_{i=1} V_{s_i} \\
 (4) \text{ DW:FW}_{vw_j} &= \sum_{i=1} \left( \text{DW:FW}_{disk_i} \left( \frac{V_{s_i}}{V_{t_j}} \right)_i \right) \\
 (5) \text{ BM}_{ts_j} &= \text{DW:FW}_{vw_j} * \text{FW}_{stem_j}
 \end{aligned}$$

where:

steps (1), (2), (3), (4), and (5) correspond to the written steps in the manuscript

DW:FW<sub>disk<sub>i</sub></sub> = Dry weight to fresh weight ratio of stem disk *i* with bark

DW<sub>disk<sub>i</sub></sub> = Dry weight of stem disk *i* with bark (g)

FW<sub>disk<sub>i</sub></sub> = Fresh weight of stem disk *i* with bark (g)

V<sub>s<sub>i</sub></sub> = Volume of stem section *i* by Smalian's formula (m<sup>3</sup>)

l<sub>s<sub>i</sub></sub> = Length of stem section *i* (cm)

g<sub>1<sub>i</sub></sub> = Lower surface's cross sectional area of an ellipse of section *i* (mm<sup>2</sup>)

g<sub>2<sub>i</sub></sub> = Upper surface's cross sectional area of an ellipse of section *i* (mm<sup>2</sup>)

g = Cross sectional area of an ellipse =  $\frac{\pi}{4} (d_1 * d_2)$

d<sub>1</sub> = Maximum diameter (mm)

$d_2$  = Minimum diameter (mm)

$V_{t_j}$  = Total stem volume of tree  $j$  (m<sup>3</sup>)

DW:  $FW_{vw_j}$  = Volume-weighted dry weight fresh weight ratio of the stem of tree  $j$

$FW_{stem_j}$  = Fresh weight of the stem of tree  $j$  (total fresh weight of disks + the rest of the stem of tree  $j$ )(kg)

$BM_{ts_j}$  = The volume-weighted total stem biomass of tree  $j$  (kg)

#### Stemwood biomass estimate

$$(6) A_{obi} \& A_{swi} = \frac{\pi}{4} (d_{1i} * d_{2i})$$

$$(7) P_{swi} = \frac{A_{swi}}{A_{obi}}$$

$$(8) P_{svi} = \frac{V_{si}}{V_{t_j}}$$

$$(9) P_{swsi} = P_{swi} * P_{svi}$$

$$(10) P_{vwsw_j} = \sum_{i=1} P_{swsi}$$

$$(11) BM_{sw_j} = P_{vwsw_j} * BM_{ts_j}$$

where:

steps (6), (7), (8), (9), (10), and (11) correspond to the written steps in the manuscript

$A_{obi}$  = Cross sectional elliptical over-bark area of stem disk  $i$  (mm<sup>2</sup>)

$A_{swi}$  = Cross sectional elliptical stemwood area of stem disk  $i$  (mm<sup>2</sup>)

$d_{1i}$  = Maximum diameter of stem disk  $i$  (mm)

$d_{2i}$  = Minimum diameter of stem disk  $i$  (mm)

$P_{swi}$  = Proportion of stemwood cross sectional area of stem disk  $i$  assigned to its corresponding stem section

$P_{svi}$  = Proportion of the total stem volume that stem section  $i$  represents

$V_{si}$  = Volume of stem section  $i$  by Smalian's formula (m<sup>3</sup>)

$V_{t_j}$  = Total stem volume of tree  $j$  (m<sup>3</sup>)

$P_{swsi}$  = Proportion of the stemwood in stem section  $i$

$P_{vwsw_j}$  = Volume-weighted proportion of stemwood in the stem of tree  $j$

$BM_{ts_j}$  = The volume-weighted total stem biomass of tree  $j$  (kg)

$BM_{sw_j}$  = The volume-weighted stemwood biomass of tree  $j$  (kg)

#### Stem bark biomass estimate

$$(12) P_{sbi} = 1 - P_{swi}$$

$$(13) P_{sbis_i} = P_{sbi} * P_{svi}$$

$$(14) P_{vwsb_j} = \sum_{i=1} P_{sbis_i}$$

$$(15) BM_{sb_j} = P_{vwsb_j} * BM_{ts_j}$$

where:

steps (12), (13), (14), and (15) correspond to written steps in the manuscript

$P_{sbi}$  = Proportion of stem bark of stem disk  $i$

$P_{swi}$  = Proportion of stemwood cross sectional area of stem disk  $i$  assigned to its corresponding stem section

$P_{sbis_i}$  = Proportion of stem bark of section  $i$

$P_{svi}$  = Proportion of the total stem volume that stem section  $i$  represents

$P_{vwsbj}$  = Volume-weighted proportion of stem bark of tree  $j$   
 $BM_{tsj}$  = The volume-weighted total stem biomass of tree  $j$  (kg)  
 $BM_{sbj}$  = The volume-weighted stem bark biomass of tree  $j$  (kg)

#### Live crown biomass estimate

$$(16) \quad DW_{lsbj} = \sum_{i=1} (DW_{lb_i} + DW_{leaf_i} + DW_{catkins_i})$$

$$(17) \quad FW_{lsbj} = \sum_{i=1} (FW_{lsb_i})$$

$$(18) \quad DW:FW_{lsbj} = \frac{DW_{lsbj}}{FW_{lsbj}}$$

$$(19) \quad BM_{lcj} = DW:FW_{lsbj} * FW_{tlcj}$$

where:

steps (16), (17), (18), and (19) correspond to the written steps in the manuscript

$DW_{lsbj}$  = Sum of the dry weights of live sample branches of tree  $j$  (kg)

$DW_{lb_i}$  = Dry weight of the woody material of live sample branch  $i$  (kg)

$DW_{leaf_i}$  = Dry weight of the leaves of live sample branch  $i$  (kg)

$DW_{catkins_i}$  = Dry weight of the catkins of live sample branch  $i$  (kg)

$FW_{lsbj}$  = Sum of the fresh weights of the live sample branches of tree  $j$  (kg)

$FW_{lsb_i}$  = Fresh weight of live sample branch  $i$  (kg)

$DW:FW_{lsbj}$  = Dry weight to fresh weight ratio of the live sample branches of tree  $j$

$FW_{tlcj}$  = Total fresh weight of the live crown of tree  $j$  ( $FW_{lsbj}$  + the rest of the live crown) (kg)

$BM_{lcj}$  = The biomass of the live crown of tree  $j$  (kg)

#### Live branch biomass estimate

$$(20) \quad DW_{lbj} = \sum_{i=1} DW_{lb_i}$$

$$(21) \quad DW_{lsbj} = \sum_{i=1} (DW_{lb_i} + DW_{leaf_i} + DW_{catkins_i})$$

$$(22) \quad BM_{lbj} = \frac{DW_{lbj}}{DW_{lsbj}} * BM_{lcj}$$

where:

steps (20), (21), and (22) correspond to the written steps in the manuscript

$DW_{lbj}$  = Sum of the dry weight of the woody material of live sample branches of tree  $j$  (kg)

$DW_{lb_i}$  = Dry weight of the woody material of live sample branch  $i$  (kg)

$DW_{lsbj}$  = Sum of the dry weight of live sample branches of tree  $j$  (kg)

$DW_{leaf_i}$  = Dry weight of the leaves of live sample branch  $i$  (kg)

$DW_{catkins_i}$  = Dry weight of the catkins (if present) of live sample branch  $i$  (kg)

$BM_{lcj}$  = The biomass of the live crown of tree  $j$  (kg)

$BM_{lbj}$  = The biomass of live branches of tree  $j$  (kg)

#### Leaf biomass estimate

$$(23) \quad DW_{leafj} = \sum_{i=1} DW_{leaf_i}$$

$$(24) \quad DW_{leaf+catkinsj} = DW_{leafj} + DW_{catkinsj}$$

$$(25) \quad BM_{leafj} = \frac{DW_{leaf+catkinsj}}{DW_{lsbj}} * BM_{lcj}$$

where:

steps (23), (24), and (25) correspond to the written steps in the manuscript

$DW_{leaf_j}$  = Sum of the dry weight of leaves of the live sample branches of tree  $j$  (kg)

$DW_{leaf_i}$  = Dry weight of the leaves of live sample branch  $i$  (kg)

$DW_{leaf+catkins_j}$  = Dry weight of leaves and catkins (if present) of tree  $j$  (kg)

$DW_{catkins_j}$  = Dry weight of the catkins (if present) of tree  $j$  (kg)

$DW_{lsb_j}$  = Sum of the dry weight of live sample branches of tree  $j$  (kg)

$BM_{lc_j}$  = The biomass of the live crown of tree  $j$  (kg)

$BM_{leaf_j}$  = The biomass of the leaves and catkins (if present) of tree  $j$  (kg)

#### Dead branch biomass estimate

$$(26) \quad DW:FW_{sdb_j} = \frac{DW_{sdb_j}}{FW_{sdb_j}}$$

$$(27) \quad BM_{db_j} = DW:FW_{sdb_j} * FW_{tdb_j}$$

where:

steps (26) and (27) correspond to the written steps in the manuscript

$DW:FW_{sdb_j}$  = Dry weight to fresh weight ratio of sampled dead branches of tree  $j$

$DW_{sdb_j}$  = Dry weight of sampled dead branches of tree  $j$  (kg)

$FW_{sdb_j}$  = Fresh weight of sampled dead branches of tree  $j$  (kg)

$FW_{tdb_j}$  = Total fresh weight of all dead branches in the crown of tree  $j$  ( $FW_{sdb_j}$  + the rest of the dead branches in the crown of tree  $j$ )(kg)

$BM_{db_j}$  = The biomass of dead branches (if present) of tree  $j$  (kg)

#### Total aboveground biomass estimate

$$(28) \quad BM_{tag_j} = BM_{ts_j} + BM_{lc_j} + BM_{db_j}$$

where:

step (28) corresponds to the written step in the manuscript

$BM_{ts_j}$  = The volume-weighted total stem biomass of tree  $j$  (kg)

$BM_{lc_j}$  = The biomass of the live crown of tree  $j$  (kg)

$BM_{db_j}$  = The biomass of the dead branches of tree  $j$  (kg)

$BM_{tag_j}$  = The total aboveground biomass of tree  $j$  (kg)

### **Appendix C. Covariance matrices for single- and two-variable functions**

**Table A.C.1. Parameter covariance matrix ( $\Psi_f$ ) of the single-variable biomass**

**function for total aboveground biomass (TAG<sub>a</sub>).**

|           | $\beta_0$ | $\beta_d$ |
|-----------|-----------|-----------|
| $\beta_0$ | 0.00011   |           |
| $\beta_d$ | -0.00044  | 0.00195   |

**Table A.C.2. Parameter covariance matrix ( $\Psi_f$ ) of the single-variable biomass function for total stem biomass (TS<sub>d</sub>).**

|           | $\beta_0$ | $\beta_d$ |
|-----------|-----------|-----------|
| $\beta_0$ | 0.00012   |           |
| $\beta_d$ | -0.00055  | 0.00291   |

**Table A.C.3. Parameter covariance matrix ( $\Psi_f$ ) of the single-variable biomass function for stemwood biomass (SW<sub>d</sub>).**

|           | $\beta_0$ | $\beta_d$ |
|-----------|-----------|-----------|
| $\beta_0$ | 0.00009   |           |
| $\beta_d$ | -0.00049  | 0.00310   |

**Table A.C.4. Parameter covariance matrix ( $\Psi_f$ ) of the single-variable biomass function for stem bark biomass (SB<sub>d</sub>).**

|           | $\beta_0$                   | $\beta_d$ |
|-----------|-----------------------------|-----------|
| $\beta_0$ | 7.53085 [10 <sup>-6</sup> ] |           |
| $\beta_d$ | -0.00020                    | 0.00590   |

**Table A.C.5. Parameter covariance matrix ( $\Psi_f$ ) of the single-variable biomass function for live crown biomass (LC<sub>d</sub>).**

|           | $\beta_0$ | $\beta_d$ |
|-----------|-----------|-----------|
| $\beta_0$ | 0.00003   |           |
| $\beta_d$ | -0.00050  | 0.01042   |

**Table A.C.6. Parameter covariance matrix ( $\Psi_f$ ) of the single-variable biomass function for live branch biomass (LB<sub>d</sub>).**

|           | $\beta_0$                   | $\beta_d$ |
|-----------|-----------------------------|-----------|
| $\beta_0$ | 7.72835 [10 <sup>-6</sup> ] |           |
| $\beta_d$ | -0.00026                    | 0.00938   |

**Table A.C.7. Parameter covariance matrix ( $\Psi_f$ ) of the single-variable biomass function for leaf biomass (LF<sub>d</sub>).**

|           | $\beta_0$                   | $\beta_d$ |
|-----------|-----------------------------|-----------|
| $\beta_0$ | 5.95136 [10 <sup>-6</sup> ] |           |
| $\beta_d$ | -0.00030                    | 0.01888   |

**Table A.C.8. Parameter covariance matrix ( $\Psi_f$ ) of the single-variable biomass function for dead branch biomass (DB<sub>d</sub>).**

|           | $\beta_0$                   | $\beta_d$ |
|-----------|-----------------------------|-----------|
| $\beta_0$ | 5.21287 [10 <sup>-6</sup> ] |           |
| $\beta_d$ | -0.00063                    | 0.08046   |

**Table A.C.9. Parameter covariance matrix ( $\Psi_f$ ) of the two-variable biomass function for total aboveground biomass (TAG<sub>dh</sub>).**

|           | $\beta_0$ | $\beta_d$ | $\beta_h$ |
|-----------|-----------|-----------|-----------|
| $\beta_0$ | 0.00006   |           |           |
| $\beta_d$ | 0.00020   | 0.00489   |           |
| $\beta_h$ | -0.00070  | -0.00673  | 0.01279   |

**Table A.C.10. Parameter covariance matrix ( $\Psi_f$ ) of the two-variable biomass function for total stem biomass (TS<sub>dh</sub>).**

|           | $\beta_0$                   | $\beta_d$ | $\beta_h$ |
|-----------|-----------------------------|-----------|-----------|
| $\beta_0$ | 7.63909 [10 <sup>-6</sup> ] |           |           |
| $\beta_d$ | 0.00005                     | 0.00333   |           |
| $\beta_h$ | -0.00019                    | -0.00440  | 0.00799   |

**Table A.C.11. Parameter covariance matrix ( $\Psi_f$ ) of the two-variable biomass function for stemwood biomass (SW<sub>dh</sub>).**

|           | $\beta_0$                   | $\beta_d$ | $\beta_h$ |
|-----------|-----------------------------|-----------|-----------|
| $\beta_0$ | 4.30251 [10 <sup>-6</sup> ] |           |           |
| $\beta_d$ | 0.00004                     | 0.00332   |           |
| $\beta_h$ | -0.00014                    | -0.00438  | 0.00782   |



**Table A.C.12. Parameter covariance matrix ( $\Psi_f$ ) of the two-variable biomass function for stem bark biomass (SB<sub>dh</sub>).**

|           | $\beta_o$                   | $\beta_d$ | $\beta_h$ |
|-----------|-----------------------------|-----------|-----------|
| $\beta_o$ | 2.55211 [10 <sup>-6</sup> ] |           |           |
| $\beta_d$ | 0.00008                     | 0.01434   |           |
| $\beta_h$ | -0.00029                    | -0.02115  | 0.04571   |

**Table A.C.13. Parameter covariance matrix ( $\Psi_f$ ) of the two-variable biomass function for live crown biomass (LC<sub>dh</sub>).**

|           | $\beta_o$ | $\beta_d$ | $\beta_h$ |
|-----------|-----------|-----------|-----------|
| $\beta_o$ | 0.00049   |           |           |
| $\beta_d$ | 0.00148   | 0.03068   |           |
| $\beta_h$ | -0.00542  | -0.04366  | 0.08934   |

**Table A.C.14. Parameter covariance matrix ( $\Psi_f$ ) of the two-variable biomass function for live branch biomass (LB<sub>dh</sub>).**

|           | $\beta_o$ | $\beta_d$ | $\beta_h$ |
|-----------|-----------|-----------|-----------|
| $\beta_o$ | 0.00011   |           |           |
| $\beta_d$ | 0.00069   | 0.03005   |           |
| $\beta_h$ | -0.00237  | -0.04188  | 0.08060   |

**A.C.15. Residual covariance matrix  $\Sigma$  for single-variable biomass functions.**

|                       | Res. TAG <sub>d</sub> | Res. TS <sub>d</sub> | Res. SW <sub>d</sub> | Res. SB <sub>d</sub> | Res. LC <sub>d</sub> | Res. LB <sub>d</sub> | Res. LF <sub>d</sub> | Res. DB <sub>d</sub> |
|-----------------------|-----------------------|----------------------|----------------------|----------------------|----------------------|----------------------|----------------------|----------------------|
| Res. TAG <sub>d</sub> | 456.92051             |                      |                      |                      |                      |                      |                      |                      |
| Res. TS <sub>d</sub>  | 357.45628             | 488.03138            |                      |                      |                      |                      |                      |                      |
| Res. SW <sub>d</sub>  | 255.96758             | 331.84240            | 244.35479            |                      |                      |                      |                      |                      |
| Res. SB <sub>d</sub>  | 90.75776              | 134.78428            | 75.04395             | 52.84070             |                      |                      |                      |                      |
| Res. LC <sub>d</sub>  | 107.11887             | -94.82201            | -60.62131            | -28.14675            | 190.72404            |                      |                      |                      |
| Res. LB <sub>d</sub>  | 133.43144             | -46.20378            | -33.96514            | -9.53215             | 176.88983            | 172.50598            |                      |                      |
| Res. LF <sub>d</sub>  | 0.29437               | -7.36793             | -4.88840             | -1.90201             | 7.30314              | 5.79553              | 1.55523              |                      |
| Res. DB <sub>d</sub>  | 1.80268               | 5.30791              | 3.43170              | 1.50237              | -2.67981             | -1.79410             | -0.28645             | 0.42875              |

**A.C.16. Residual covariance matrix  $\Sigma$  for two-variable biomass functions.**

|                        | Res. TAG <sub>dh</sub> | Res. TS <sub>dh</sub> | Res. SW <sub>dh</sub> | Res. SB <sub>dh</sub> | Res. LC <sub>dh</sub> | Res. LB <sub>dh</sub> |
|------------------------|------------------------|-----------------------|-----------------------|-----------------------|-----------------------|-----------------------|
| Res. TAG <sub>dh</sub> | 480.29573              |                       |                       |                       |                       |                       |
| Res. TS <sub>dh</sub>  | 296.22257              | 261.88310             |                       |                       |                       |                       |
| Res. SW <sub>dh</sub>  | 243.53965              | 195.76021             | 182.12349             |                       |                       |                       |
| Res. SB <sub>dh</sub>  | 61.66899               | 71.02619              | 19.03552              | 52.66629              |                       |                       |
| Res. LC <sub>dh</sub>  | 195.01797              | 42.66572              | 63.31380              | -15.55137             | 160.62961             |                       |
| Res. LB <sub>dh</sub>  | 207.77599              | 60.74303              | 69.85139              | -3.73878              | 153.77029             | 151.42379             |
