# Supplementary material
Source: publisher figshare collection journal article supplement (https://tandf.figshare.com/articles/dataset/_/1130924)
Supplement: Supplementary file 2 [file 3]

**Appendix A. List of abbreviations and select terms used in the manuscript in alphabetical order**

AIC: Akaike Information Criterion

C: Celsius

cm: centimeters

commercial size trees: Development classes 3-5 definition from Norwegian NFI (Antón-Fernández and Astrup 2012). Younger, older, and mature productive forest with satisfactory stand density. Species proportions are reported according to volume in these harvest classes.

complete crown: The function biomass combination from the current study of live crown ( $LC_{dh}$ ) and dead branches ( $DB_d$ ).

$DB_d$ : Dead branch biomass single-variable model

dbh: Diameter at breast height (1.3 m)

DW: Dry weight

FW: Fresh weight

H40: Height of tree at 40 years of age

ha: hectare

height-to-live-crown: distance from the ground to the base of the live crown, ignoring one time a single live branch if separated by more than two whorls from the next live branch.

kg: kilogram

$LB_d$ : Live branch biomass single-variable model

$LB_{dh}$ : Live branch biomass two-variable model

$LC_d$ : Live crown biomass single-variable model

$LC_{dh}$ : Live crown biomass two-variable model

$LF_d$ : Leaf biomass single-variable model

m: meter

m.a.s.l.: meters above sea level

m.t.b.: million tons biomass

51  
 52 N: Number  
 53  
 54 NFI: National Forest Inventory  
 55  
 56 NLME: Nonlinear mixed-effects model  
 57  
 58 NNFI: Norwegian National Forest Inventory  
 59  
 60 NNFI8: Norwegian National Forest Inventory 8th inventory (2000-2004)  
 61  
 62 NNFI9: Norwegian National Forest Inventory 9th inventory (2005-2009)  
 63  
 64 older stands: Development classes 4 and 5 definition from Norwegian NFI (Antón-  
 65 Fernández and Astrup 2012). Older and mature productive forest with satisfactory stand  
 66 density.  
 67  
 68 p: p-value  
 69  
 70 RMSE: Root Mean Square Error  
 71  
 72 sapling size trees: Development classes 1 and 2 definition from Norwegian NFI (Antón-  
 73 Fernández and Astrup 2012). Young newly regenerating to satisfactorily dense forest.  
 74 Species proportions are reported according to crown cover percentage in these harvest  
 75 classes.  
 76  
 77 SB<sub>d</sub>: Stem bark biomass single-variable model  
 78  
 79 SB<sub>dh</sub>: Stem bark biomass two-variable model  
 80  
 81 std. error: Standard error  
 82  
 83 SW<sub>d</sub>: Stemwood biomass single-variable model  
 84  
 85 SW<sub>dh</sub>: Stemwood biomass two-variable model  
 86  
 87 TAG<sub>B</sub>: Total aboveground biomass component combination from Bollandsås et al.  
 88 (2009) using: over-bark (“Stem”) + total crown (“Tree crown”) biomass  
 89  
 90 TAG<sub>combination 1</sub>: Total aboveground component combination using: TS<sub>dh</sub> + LC<sub>dh</sub> + DB<sub>d</sub>  
 91  
 92 TAG<sub>combination 2</sub>: Total aboveground component combination using: SW<sub>dh</sub> + SB<sub>d</sub> + LB<sub>dh</sub>  
 93 + LF<sub>d</sub> + DB<sub>d</sub>  
 94  
 95 TAG<sub>d</sub>: Total aboveground biomass single-variable model (model fit with the BM<sub>ts</sub> +  
 96 BM<sub>lc</sub> + BM<sub>db</sub> biomass estimates (Appendix B))  
 97  
 98 TAG<sub>dh</sub>: Total aboveground biomass two-variable model (model fit with the BM<sub>ts</sub> +  
 99 BM<sub>lc</sub> + BM<sub>db</sub> biomass estimates (Appendix B))  
 100

Commented [AS1]: multiplication

101 TAG<sub>M</sub>: Total aboveground biomass for Marklund using: stemwood (B-5) + stem bark  
 102 (B-8) + live branch (B-11) + dead branch (B-16) + leaves (where leaf biomass = B-5  
 103 (0.011<sup>a</sup>/0.52<sup>b</sup>) (<sup>a</sup> Factor currently applied by NNFI for UNFCCC reporting; <sup>b</sup> de Wit et  
 104 al. 2006)

105  
 106 TAG<sub>S</sub>: Total aboveground biomass component combination of the current study using:  
 107 SW<sub>dh</sub> + SB<sub>d</sub> + LB<sub>dh</sub> + DB<sub>d</sub> + LF<sub>d</sub>

108  
 109 total crown: Observed crown biomass of the mountain birch sample trees including the  
 110 live and dead branches (if present) (Bollandsås et al. 2009).

111  
 112 TS<sub>d</sub>: Total stem biomass single-variable model

113  
 114 TS<sub>dh</sub>: Total stem biomass two-variable model

115  
 116 UNFCCC: United Nations Framework Convention on Climate Change

117  
 118 Unprod.: Unproductive birch forest = potential yield < 1 m<sup>3</sup> ha<sup>-1</sup> yr<sup>-1</sup>

119  
 120 volume-weighted total stem biomass: The average stem biomass weighted by volume of  
 121 the stem section from which the sample disk was taken.

122  
 123 young stands: Development classes 1 and 2 definition from Norwegian NFI (Antón-  
 124 Fernández and Astrup 2012). Young newly regenerating to satisfactorily dense forest.

## 126 Appendix B. Detailed methods for the aboveground biomass dataset

### 127 Total stem biomass estimate

$$128 \quad (1) \text{ DW:FW}_{disk_i} = \frac{DW_{disk_i}}{FW_{disk_i}}$$

$$129 \quad (2) V_{s_i} = \frac{l_{s_i}(g_{1_i} + g_{2_i})}{2} \quad (\text{Smalian's formula})$$

$$130 \quad (3) V_{t_j} = \sum_{i=1} V_{s_i}$$

$$131 \quad (4) \text{ DW:FW}_{vw_j} = \sum_{i=1} \left( \text{DW:FW}_{disk_i} \left( \frac{V_{s_i}}{V_{t_j}} \right) \right)$$

$$132 \quad (5) \text{ BM}_{ts_j} = \text{DW:FW}_{vw_j} * \text{FW}_{stem_j}$$

133 where:

134 steps (1), (2), (3), (4), and (5) correspond to the written steps in the manuscript

135 DW:FW<sub>disk<sub>i</sub></sub> = Dry weight to fresh weight ratio of stem disk *i* with bark

136 DW<sub>disk<sub>i</sub></sub> = Dry weight of stem disk *i* with bark (g)

137 FW<sub>disk<sub>i</sub></sub> = Fresh weight of stem disk *i* with bark (g)

138 V<sub>s<sub>i</sub></sub> = Volume of stem section *i* by Smalian's formula (m<sup>3</sup>)

139 l<sub>s<sub>i</sub></sub> = Length of stem section *i* (cm)

140 g<sub>1<sub>i</sub></sub> = Lower surface's cross sectional area of an ellipse of section *i* (mm<sup>2</sup>)

141 g<sub>2<sub>i</sub></sub> = Upper surface's cross sectional area of an ellipse of section *i* (mm<sup>2</sup>)

142 g = Cross sectional area of an ellipse =  $\frac{\pi}{4} (d_1 * d_2)$

143 d<sub>1</sub> = Maximum diameter (mm)

144  $d_2$  = Minimum diameter (mm)  
 145  $V_{tj}$  = Total stem volume of tree  $j$  (m<sup>3</sup>)  
 146 DW:FW<sub>vwj</sub> = Volume-weighted dry weight fresh weight ratio of the stem of tree  $j$   
 147 FW<sub>stemj</sub> = Fresh weight of the stem of tree  $j$  (total fresh weight of disks + the rest of the  
 148 stem of tree  $j$ )(kg)  
 149 BM<sub>tsj</sub> = The volume-weighted total stem biomass of tree  $j$  (kg)

150  
 151 Stemwood biomass estimate

152 (6)  $A_{obi}$  &  $A_{swi} = \frac{\pi}{4}(d_{1i} * d_{2i})$

153 (7)  $P_{swi} = \frac{A_{swi}}{A_{obi}}$

154 (8)  $P_{svi} = \frac{V_{si}}{V_{tj}}$

155 (9)  $P_{swsi} = P_{swi} * P_{svi}$

156 (10)  $P_{vswsj} = \sum_{i=1} P_{swsi}$

157 (11)  $BM_{swj} = P_{vswsj} * BM_{tsj}$

158 where:

159 steps (6), (7), (8), (9), (10), and (11) correspond to the written steps in the manuscript

160  $A_{obi}$  = Cross sectional elliptical over-bark area of stem disk  $i$  (mm<sup>2</sup>)

161  $A_{swi}$  = Cross sectional elliptical stemwood area of stem disk  $i$  (mm<sup>2</sup>)

162  $d_{1i}$  = Maximum diameter of stem disk  $i$  (mm)

163  $d_{2i}$  = Minimum diameter of stem disk  $i$  (mm)

164  $P_{swi}$  = Proportion of stemwood cross sectional area of stem disk  $i$  assigned to its  
 165 corresponding stem section

166  $P_{svi}$  = Proportion of the total stem volume that stem section  $i$  represents

167  $V_{si}$  = Volume of stem section  $i$  by Smalian's formula (m<sup>3</sup>)

168  $V_{tj}$  = Total stem volume of tree  $j$  (m<sup>3</sup>)

169  $P_{swsi}$  = Proportion of the stemwood in stem section  $i$

170  $P_{vswsj}$  = Volume-weighted proportion of stemwood in the stem of tree  $j$

171 BM<sub>tsj</sub> = The volume-weighted total stem biomass of tree  $j$  (kg)

172 BM<sub>swj</sub> = The volume-weighted stemwood biomass of tree  $j$  (kg)

173

174 Stem bark biomass estimate

175 (12)  $P_{sbi} = 1 - P_{swi}$

176 (13)  $P_{bsi} = P_{sbi} * P_{svi}$

177 (14)  $P_{vwsbj} = \sum_{i=1} P_{bsi}$

178 (15)  $BM_{sbj} = P_{vwsbj} * BM_{tsj}$

179 where:

180 steps (12), (13), (14), and (15) correspond to written steps in the manuscript

181  $P_{sbi}$  = Proportion of stem bark of stem disk  $i$

182  $P_{swi}$  = Proportion of stemwood cross sectional area of stem disk  $i$  assigned to its  
 183 corresponding stem section

184  $P_{bsi}$  = Proportion of stem bark of section  $i$

185  $P_{svi}$  = Proportion of the total stem volume that stem section  $i$  represents

186  $P_{vwsb_j}$  = Volume-weighted proportion of stem bark of tree  $j$   
187  $BM_{ts_j}$  = The volume-weighted total stem biomass of tree  $j$  (kg)  
188  $BM_{sb_j}$  = The volume-weighted stem bark biomass of tree  $j$  (kg)  
189  
190 Live crown biomass estimate  
191 (16)  $DW_{lsb_j} = \sum_{i=1} (DW_{lb_i} + DW_{leaf_i} + DW_{catkins_i})$   
192 (17)  $FW_{lsb_j} = \sum_{i=1} (FW_{lsb_i})$   
193 (18)  $DW:FW_{lsb_j} = \frac{DW_{lsb_j}}{FW_{lsb_j}}$   
194 (19)  $BM_{lc_j} = DW:FW_{lsb_j} * FW_{tlc_j}$   
195 where:  
196 steps (16), (17), (18), and (19) correspond to the written steps in the manuscript  
197  $DW_{lsb_j}$  = Sum of the dry weights of live sample branches of tree  $j$  (kg)  
198  $DW_{lb_i}$  = Dry weight of the woody material of live sample branch  $i$  (kg)  
199  $DW_{leaf_i}$  = Dry weight of the leaves of live sample branch  $i$  (kg)  
200  $DW_{catkins_i}$  = Dry weight of the catkins of live sample branch  $i$  (kg)  
201  $FW_{lsb_j}$  = Sum of the fresh weights of the live sample branches of tree  $j$  (kg)  
202  $FW_{lsb_i}$  = Fresh weight of live sample branch  $i$  (kg)  
203  $DW:FW_{lsb_j}$  = Dry weight to fresh weight ratio of the live sample branches of tree  $j$   
204  $FW_{tlc_j}$  = Total fresh weight of the live crown of tree  $j$  ( $FW_{lsb_j}$  + the rest of the live  
205 crown )(kg)  
206  $BM_{lc_j}$  = The biomass of the live crown of tree  $j$  (kg)  
207  
208 Live branch biomass estimate  
209 (20)  $DW_{lb_j} = \sum_{i=1} DW_{lb_i}$   
210 (21)  $DW_{lsb_j} = \sum_{i=1} (DW_{lb_i} + DW_{leaf_i} + DW_{catkins_i})$   
211 (22)  $BM_{lb_j} = \frac{DW_{lb_j}}{DW_{lsb_j}} * BM_{lc_j}$   
212 where:  
213 steps (20), (21), and (22) correspond to the written steps in the manuscript  
214  $DW_{lb_j}$  = Sum of the dry weight of the woody material of live sample branches of tree  $j$   
215 (kg)  
216  $DW_{lb_i}$  = Dry weight of the woody material of live sample branch  $i$  (kg)  
217  $DW_{lsb_j}$  = Sum of the dry weight of live sample branches of tree  $j$  (kg)  
218  $DW_{leaf_i}$  = Dry weight of the leaves of live sample branch  $i$  (kg)  
219  $DW_{catkins_i}$  = Dry weight of the catkins (if present) of live sample branch  $i$  (kg)  
220  $BM_{lc_j}$  = The biomass of the live crown of tree  $j$  (kg)  
221  $BM_{lb_j}$  = The biomass of live branches of tree  $j$  (kg)  
222  
223 Leaf biomass estimate  
224 (23)  $DW_{leaf_j} = \sum_{i=1} DW_{leaf_i}$   
225 (24)  $DW_{leaf+catkins_j} = DW_{leaf_j} + DW_{catkins_j}$   
226 (25)  $BM_{leaf_j} = \frac{DW_{leaf+catkins_j}}{DW_{lsb_j}} * BM_{lc_j}$

where:  
 steps (23), (24), and (25) correspond to the written steps in the manuscript  
 $DW_{leaf_j}$  = Sum of the dry weight of leaves of the live sample branches of tree  $j$  (kg)  
 $DW_{leaf_i}$  = Dry weight of the leaves of live sample branch  $i$  (kg)  
 $DW_{leaf+catkins_j}$  = Dry weight of leaves and catkins (if present) of tree  $j$  (kg)  
 $DW_{catkins_j}$  = Dry weight of the catkins (if present) of tree  $j$  (kg)  
 $DW_{lsb_j}$  = Sum of the dry weight of live sample branches of tree  $j$  (kg)  
 $BM_{lc_j}$  = The biomass of the live crown of tree  $j$  (kg)  
 $BM_{leaf_j}$  = The biomass of the leaves and catkins (if present) of tree  $j$  (kg)

#### Dead branch biomass estimate

$$(26) \quad DW:FW_{sdb_j} = \frac{DW_{sdb_j}}{FW_{sdb_j}}$$

$$(27) \quad BM_{db_j} = DW:FW_{sdb_j} * FW_{tdb_j}$$

where:  
 steps (26) and (27) correspond to the written steps in the manuscript  
 $DW:FW_{sdb_j}$  = Dry weight to fresh weight ratio of sampled dead branches of tree  $j$   
 $DW_{sdb_j}$  = Dry weight of sampled dead branches of tree  $j$  (kg)  
 $FW_{sdb_j}$  = Fresh weight of sampled dead branches of tree  $j$  (kg)  
 $FW_{tdb_j}$  = Total fresh weight of all dead branches in the crown of tree  $j$  ( $FW_{sdb_j}$  + the rest of the dead branches in the crown of tree  $j$ )(kg)  
 $BM_{db_j}$  = The biomass of dead branches (if present) of tree  $j$  (kg)

#### Total aboveground biomass estimate

$$(28) \quad BM_{tag_j} = BM_{ts_j} + BM_{lc_j} + BM_{db_j}$$

where:  
 step (28) corresponds to the written step in the manuscript  
 $BM_{ts_j}$  = The volume-weighted total stem biomass of tree  $j$  (kg)  
 $BM_{lc_j}$  = The biomass of the live crown of tree  $j$  (kg)  
 $BM_{db_j}$  = The biomass of the dead branches of tree  $j$  (kg)  
 $BM_{tag_j}$  = The total aboveground biomass of tree  $j$  (kg)

### **Appendix C. Covariance matrices for single- and two-variable functions**

**Table A.C.1. Parameter covariance matrix ( $\Psi_f$ ) of the single-variable biomass function for total aboveground biomass (TAGd).**

|           | $\beta_o$ | $\beta_d$ |
|-----------|-----------|-----------|
| $\beta_o$ | 0.00011   |           |
| $\beta_d$ | -0.00044  | 0.00195   |

**Table A.C.2. Parameter covariance matrix ( $\Psi_f$ ) of the single-variable biomass function for total stem biomass (TS<sub>d</sub>).**

|           | $\beta_0$ | $\beta_d$ |
|-----------|-----------|-----------|
| $\beta_0$ | 0.00012   |           |
| $\beta_d$ | -0.00055  | 0.00291   |

**Table A.C.3. Parameter covariance matrix ( $\Psi_f$ ) of the single-variable biomass function for stemwood biomass (SW<sub>d</sub>).**

|           | $\beta_0$ | $\beta_d$ |
|-----------|-----------|-----------|
| $\beta_0$ | 0.00009   |           |
| $\beta_d$ | -0.00049  | 0.00310   |

**Table A.C.4. Parameter covariance matrix ( $\Psi_f$ ) of the single-variable biomass function for stem bark biomass (SB<sub>d</sub>).**

|           | $\beta_0$                   | $\beta_d$ |
|-----------|-----------------------------|-----------|
| $\beta_0$ | 7.53085 [10 <sup>-6</sup> ] |           |
| $\beta_d$ | -0.00020                    | 0.00590   |

**Table A.C.5. Parameter covariance matrix ( $\Psi_f$ ) of the single-variable biomass function for live crown biomass (LC<sub>d</sub>).**

|           | $\beta_0$ | $\beta_d$ |
|-----------|-----------|-----------|
| $\beta_0$ | 0.00003   |           |
| $\beta_d$ | -0.00050  | 0.01042   |

**Table A.C.6. Parameter covariance matrix ( $\Psi_f$ ) of the single-variable biomass function for live branch biomass (LB<sub>d</sub>).**

|           | $\beta_0$                   | $\beta_d$ |
|-----------|-----------------------------|-----------|
| $\beta_0$ | 7.72835 [10 <sup>-6</sup> ] |           |
| $\beta_d$ | -0.00026                    | 0.00938   |

**Table A.C.7. Parameter covariance matrix ( $\Psi_f$ ) of the single-variable biomass function for leaf biomass (LF<sub>d</sub>).**

|           | $\beta_0$                   | $\beta_d$ |
|-----------|-----------------------------|-----------|
| $\beta_0$ | 5.95136 [10 <sup>-6</sup> ] |           |
| $\beta_d$ | -0.00030                    | 0.01888   |

**Table A.C.8. Parameter covariance matrix ( $\Psi_f$ ) of the single-variable biomass function for dead branch biomass (DB<sub>d</sub>).**

|           | $\beta_0$                   | $\beta_d$ |
|-----------|-----------------------------|-----------|
| $\beta_0$ | 5.21287 [10 <sup>-6</sup> ] |           |
| $\beta_d$ | -0.00063                    | 0.08046   |

**Table A.C.9. Parameter covariance matrix ( $\Psi_f$ ) of the two-variable biomass function for total aboveground biomass (TAG<sub>dh</sub>).**

|           | $\beta_0$ | $\beta_d$ | $\beta_h$ |
|-----------|-----------|-----------|-----------|
| $\beta_0$ | 0.00006   |           |           |
| $\beta_d$ | 0.00020   | 0.00489   |           |
| $\beta_h$ | -0.00070  | -0.00673  | 0.01279   |

**Table A.C.10. Parameter covariance matrix ( $\Psi_f$ ) of the two-variable biomass function for total stem biomass (TS<sub>dh</sub>).**

|           | $\beta_0$                   | $\beta_d$ | $\beta_h$ |
|-----------|-----------------------------|-----------|-----------|
| $\beta_0$ | 7.63909 [10 <sup>-6</sup> ] |           |           |
| $\beta_d$ | 0.00005                     | 0.00333   |           |
| $\beta_h$ | -0.00019                    | -0.00440  | 0.00799   |

**Table A.C.11. Parameter covariance matrix ( $\Psi_f$ ) of the two-variable biomass function for stemwood biomass (SW<sub>dh</sub>).**

|           | $\beta_0$                   | $\beta_d$ | $\beta_h$ |
|-----------|-----------------------------|-----------|-----------|
| $\beta_0$ | 4.30251 [10 <sup>-6</sup> ] |           |           |
| $\beta_d$ | 0.00004                     | 0.00332   |           |
| $\beta_h$ | -0.00014                    | -0.00438  | 0.00782   |



**Table A.C.12. Parameter covariance matrix ( $\Psi_f$ ) of the two-variable biomass function for stem bark biomass (SB<sub>dh</sub>).**

|           | $\beta_0$                   | $\beta_d$ | $\beta_h$ |
|-----------|-----------------------------|-----------|-----------|
| $\beta_0$ | 2.55211 [10 <sup>-6</sup> ] |           |           |
| $\beta_d$ | 0.00008                     | 0.01434   |           |
| $\beta_h$ | -0.00029                    | -0.02115  | 0.04571   |

**Table A.C.13. Parameter covariance matrix ( $\Psi_f$ ) of the two-variable biomass function for live crown biomass (LC<sub>dh</sub>).**

|           | $\beta_0$ | $\beta_d$ | $\beta_h$ |
|-----------|-----------|-----------|-----------|
| $\beta_0$ | 0.00049   |           |           |
| $\beta_d$ | 0.00148   | 0.03068   |           |
| $\beta_h$ | -0.00542  | -0.04366  | 0.08934   |

**Table A.C.14. Parameter covariance matrix ( $\Psi_f$ ) of the two-variable biomass function for live branch biomass (LB<sub>dh</sub>).**

|           | $\beta_0$ | $\beta_d$ | $\beta_h$ |
|-----------|-----------|-----------|-----------|
| $\beta_0$ | 0.00011   |           |           |
| $\beta_d$ | 0.00069   | 0.03005   |           |
| $\beta_h$ | -0.00237  | -0.04188  | 0.08060   |

301    **A.C.15. Residual covariance matrix  $\Sigma$  for single-variable biomass functions.**

|                       | Res. TAG <sub>d</sub> | Res. TS <sub>d</sub> | Res. SW <sub>d</sub> | Res. SB <sub>d</sub> | Res. LC <sub>d</sub> | Res. LB <sub>d</sub> | Res. LF <sub>d</sub> | Res. DB <sub>d</sub> |
|-----------------------|-----------------------|----------------------|----------------------|----------------------|----------------------|----------------------|----------------------|----------------------|
| Res. TAG <sub>d</sub> | 456.92051             |                      |                      |                      |                      |                      |                      |                      |
| Res. TS <sub>d</sub>  | 357.45628             | 488.03138            |                      |                      |                      |                      |                      |                      |
| Res. SW <sub>d</sub>  | 255.96758             | 331.84240            | 244.35479            |                      |                      |                      |                      |                      |
| Res. SB <sub>d</sub>  | 90.75776              | 134.78428            | 75.04395             | 52.84070             |                      |                      |                      |                      |
| Res. LC <sub>d</sub>  | 107.11887             | -94.82201            | -60.62131            | -28.14675            | 190.72404            |                      |                      |                      |
| Res. LB <sub>d</sub>  | 133.43144             | -46.20378            | -33.96514            | -9.53215             | 176.88983            | 172.50598            |                      |                      |
| Res. LF <sub>d</sub>  | 0.29437               | -7.36793             | -4.88840             | -1.90201             | 7.30314              | 5.79553              | 1.55523              |                      |
| Res. DB <sub>d</sub>  | 1.80268               | 5.30791              | 3.43170              | 1.50237              | -2.67981             | -1.79410             | -0.28645             | 0.42875              |

302

303    **A.C.16. Residual covariance matrix  $\Sigma$  for two-variable biomass functions.**

|                        | Res. TAG <sub>dh</sub> | Res. TS <sub>dh</sub> | Res. SW <sub>dh</sub> | Res. SB <sub>dh</sub> | Res. LC <sub>dh</sub> | Res. LB <sub>dh</sub> |
|------------------------|------------------------|-----------------------|-----------------------|-----------------------|-----------------------|-----------------------|
| Res. TAG <sub>dh</sub> | 480.29573              |                       |                       |                       |                       |                       |
| Res. TS <sub>dh</sub>  | 296.22257              | 261.88310             |                       |                       |                       |                       |
| Res. SW <sub>dh</sub>  | 243.53965              | 195.76021             | 182.12349             |                       |                       |                       |
| Res. SB <sub>dh</sub>  | 61.66899               | 71.02619              | 19.03552              | 52.66629              |                       |                       |
| Res. LC <sub>dh</sub>  | 195.01797              | 42.66572              | 63.31380              | -15.55137             | 160.62961             |                       |
| Res. LB <sub>dh</sub>  | 207.77599              | 60.74303              | 69.85139              | -3.73878              | 153.77029             | 151.42379             |

304

305

306

307
